# Supplementary material for: Enhanced degradation of atrazine by microbubble ozonation
Source: Royal Society of Chemistry journal article supplement (doi:10.1039/d0ew00227e), 2020-01-01
Supplement: d0ew00227e1.pdf [file d0ew00227e1.pdf]

**Supporting Information**

**For**

**Enhanced degradation of atrazine by microbubble ozonation**

Yunsi Liu<sup>a</sup>, Shuo Wang<sup>a</sup>, Lifang Shi<sup>a</sup>, Wanmeng Lu<sup>a</sup>, Pan Li<sup>a, b\*</sup>

<sup>a</sup> *School of Environmental Science and Engineering, Tongji University, 1239 Siping Road, Shanghai, PR China*

<sup>b</sup> *School of Environmental Science and Engineering, State Key Laboratory of Control and Resource Reuse, Tongji University, 1239 Siping Road, Shanghai, PR China*

# 1. Degradation of atrazine by ozone microbubble and macrobubble aeration at pH 5, 7 and 9

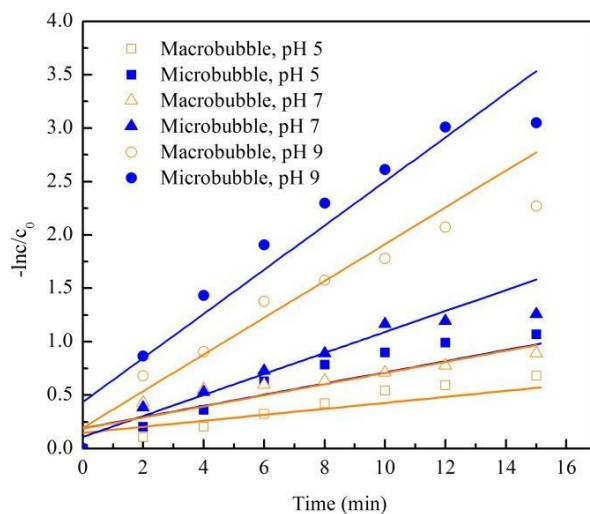

Figure S1. Degradation of atrazine by ozone microbubble and macrobubble aeration at pH 5, 7 and 9. (semi-batch experiment; initial conditions:  $[O_3] = 1\text{ mg/L}$ ,  $[Atra]_0 = 1.16\text{ }\mu\text{mol/L}$ , gas flow:  $0.5\text{ L/min}$ ,  $T = 20 \pm 1^\circ\text{C}$ )

Table S1. The pseudo-first-order kinetic equations and correlation coefficients between atrazine and macrobubble and microbubble ozone at pH 5, 7 and 9. (semi-batch experiment; initial conditions:  $[O_3] = 1\text{ mg/L}$ ,  $[Atra]_0 = 1.16\text{ }\mu\text{mol/L}$ , gas flow:  $0.5\text{ L/min}$ ,  $T = 20 \pm 1^\circ\text{C}$ ).

| Condition         | Regression equation | $R^2$ | $k_{\text{obs}}$ ( $\text{min}^{-1}$ ) |
|-------------------|---------------------|-------|----------------------------------------|
| Microbubble, pH 5 | $y=0.0531x-0.1895$  | 0.973 | 0.053                                  |
| Microbubble, pH 7 | $y=0.1008x+0.1091$  | 0.951 | 0.101                                  |
| Microbubble, pH 9 | $y=0.2410x+0.298$   | 0.983 | 0.241                                  |
| Macrobubble, pH 5 | $y=0.0281x+0.1503$  | 0.990 | 0.028                                  |
| Macrobubble, pH 7 | $y=0.0530x+0.186$   | 0.841 | 0.053                                  |
| Macrobubble, pH 9 | $y=0.1740x+0.1935$  | 0.957 | 0.174                                  |

## 2. Degradation of atrazine in the presence of TBA

The reaction rate of t-butanol and  $\cdot\text{OH}$  is equal to  $6.0 \times 10^8 \text{ L/mol}\cdot\text{s}^{-1}$ , and the reaction rate of atrazine and  $\cdot\text{OH}$  is equal to  $3.0 \times 10^9 \text{ L/mol}\cdot\text{s}^{-2}$ . Therefore, as formula (1) show, 0.06 mM TBA was used as hydroxyl radical scavenger in our experiment.

$$\frac{k_{TBA}[TBA]}{k_{Atra}[Atra]} = \frac{6.0 \times 10^8 \times 0.06 \times 10^{-3}}{3 \times 10^9 \times 1.16 \times 10^{-6}} = 10.34 \geq 10 \quad (1)$$

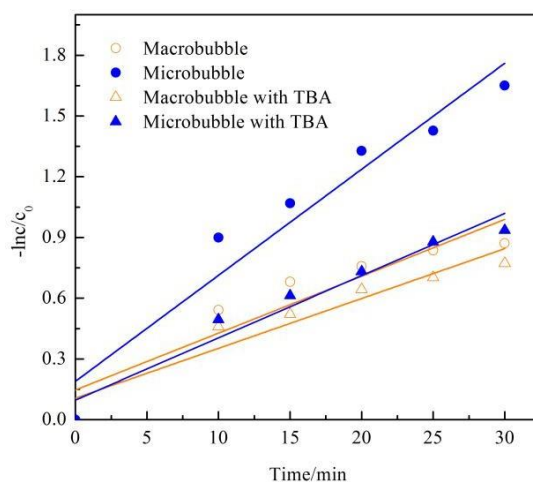

Figure S2. Degradation of atrazine by ozone microbubble and macrobubble aeration at pH 5 in the presence of TBA (semi-batch experiment; initial conditions:  $[\text{O}_3] = 1 \text{ mg/L}$ ,  $[\text{TBA}] = 0.06 \text{ mM}$ ,  $[\text{Atra}]_0 = 1.16 \mu\text{mol/L}$ , gas flow:  $0.5 \text{ L/min}$ ,  $T = 20 \pm 1^\circ\text{C}$ ).

Table S2. The pseudo-first-order kinetic equations and correlation coefficients between atrazine and macrobubble and microbubble ozone at pH 5 in the presence of TBA (semi-batch experiment; initial conditions:  $[\text{O}_3] = 1 \text{ mg/L}$ ,  $[\text{TBA}] = 0.06 \text{ mM}$ ,  $[\text{Atra}]_0 = 1.16 \mu\text{mol/L}$ , gas flow:  $0.5 \text{ L/min}$ ,  $T = 20 \pm 1^\circ\text{C}$ ).

| Condition            | Regression equation | $R^2$ | $k_{\text{obs}} (\text{min}^{-1})$ |
|----------------------|---------------------|-------|------------------------------------|
| Microbubble          | $y=0.0524x-0.1895$  | 0.938 | 0.052                              |
| Microbubble with TBA | $y=0.0307x+0.097$   | 0.950 | 0.031                              |
| Macrobubble          | $y=0.0279x+0.1503$  | 0.901 | 0.028                              |

|                      |                    |       |       |
|----------------------|--------------------|-------|-------|
| Macrobubble with TBA | $y=0.0246x+0.1063$ | 0.922 | 0.025 |
|----------------------|--------------------|-------|-------|

### 3. Size distribution of microbubbles

During our experiment, a large amount of macroscopic microbubbles appeared white and thick at the beginning of aeration, however disappeared within three minutes. In our previous study <sup>3</sup>, we examined the concentration of the microbubbles in the solution, in which above 90% of microbubbles disappeared within 1 minute and only nanobubbles left in the solution afterwards as shown in Figure S3.

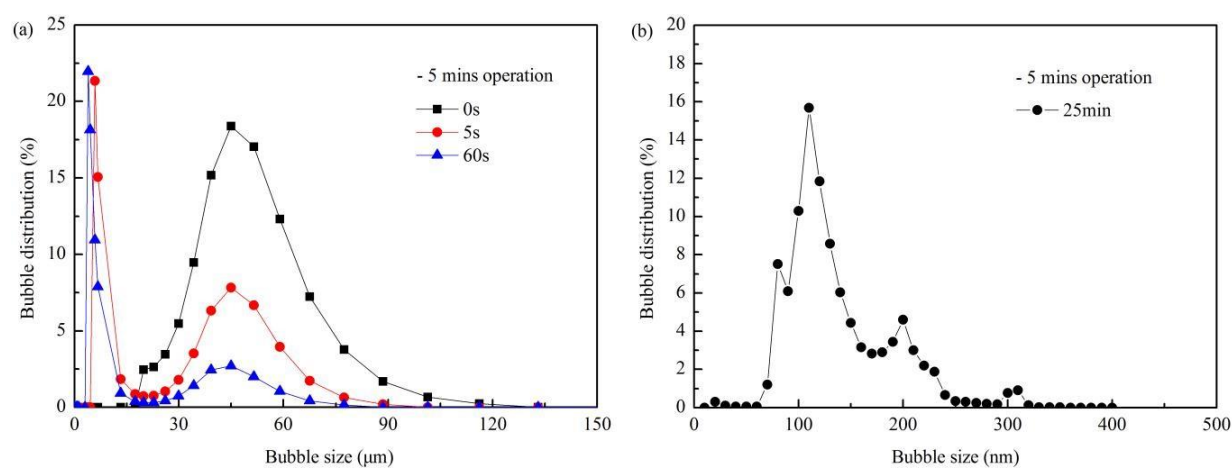

Figure S3. Size distribution of micro- and nanoscale bubbles during a 30 min cycle of aeration.

### References

- 1 M. Kuosa, J. Kallas and A. Häkkinen, Ozonation of p-nitrophenol at different pH values of water and the influence of radicals at acidic conditions, *J. Environ. Chem. Eng.*, 2015, **3**, 325–332.
- 2 J. L. Acero, K. Stemmler and U. von Gunten, Degradation Kinetics of Atrazine and Its Degradation Products with Ozone and OH Radicals: A Predictive Tool for Drinking Water Treatment, *Environ. Sci. Technol.*, 2000, **34**, 591–597.
- 3 S. Wang, Y. Liu, P. Li, Y. Wang, J. Yang and W. Zhang, Micro-nanobubble aeration promotes senescence of submerged macrophytes with low total antioxidant capacity in urban landscape water, *Environ. Sci. Water Res. Technol.*, 2020, **6**, 523–531.
